# 1           Wenzhou shrimp virus 8 (WzSV8) detection by 2           unique inclusions in shrimp hepatopancreatic E-cells 3           and by RT-PCR

4  
5           Jiraporn Srisala<sup>a</sup>, Dararat Thaiue<sup>a</sup>, Piyachat Saganrut<sup>a</sup>,  
6           Suparat Taengchaiyaphum<sup>a</sup>, Timothy W. Flegel<sup>b,c</sup>,  
7           Kallaya Sritunyalucksana<sup>a,\*</sup>

8  
9           <sup>a</sup>Aquatic Animal Health Research Team, Integrative Aquaculture Biotechnology Research  
10          Group, National Center for Genetic Engineering and Biotechnology (BIOTEC), National  
11          Science and Technology Development Agency (NSTDA), Yothi Office,  
12          Rama VI Rd., Bangkok 10400, Thailand

13          <sup>b</sup>Center of Excellence for Shrimp Molecular Biology and Biotechnology (Centex Shrimp),  
14          Faculty of Science, Mahidol University, Rama VI Rd., Bangkok 10400, Thailand

15          <sup>c</sup>National Center for Genetic Engineering and Biotechnology (BIOTEC), National Science  
16          and Technology Development Agency (NSTDA), Thailand Science Park, Khlong Luang,  
17          Pathum Thani, Thailand 12120

18  
19          \*corresponding author: [kallaya@biotec.or.th](mailto:kallaya@biotec.or.th)

## 20           **Abstract**

21           The genome sequence of Wenzhou shrimp virus 8 (WzSV8) (GenBank record KX883984.1)  
22           was described in 2015 from wide screening for RNA viruses in aquatic animals. A closely  
23           related sequence (GenBank record OK662577.1) from the whiteleg shrimp *Penaeus*  
24           *vannamei* was deposited in 2021 under the name *Penaeus vannamei* picornavirus (PvPV). In  
25           2022 another closely related sequence (GenBank accession: OP265432) was submitted under  
26           the name *Penaeus vannamei* solinvivirus (PvSV). In 2021, prior to the publication of PvPV  
27           and PvSV, we used an RT-PCR method devised from the sequence of KX883984.1  
28           (described herein) to screen for WzSV8 in specimens of cultivated shrimp. Samples that gave  
29           positive RT-PCR results were subsequently tested by *in situ* hybridization (ISH) analysis to  
30           identify virus target tissues. Several tissues gave positive ISH results within morphologically  
31           normal nuclei. Thus, these tissues were of no use for diagnosis of WzSV8 by normal  
32           histological analysis. However, unique basophilic, cytoplasmic inclusions within vacuoles in  
33           the hepatopancreatic E-cells were also found in the same WzSV8-positive shrimp specimens,  
34           sometimes accompanied by a smaller eosinophilic inclusion. We call these Lightner double  
35           Inclusions (LDI) that can be considered pathognomonic for diagnosis of WzSV8 infection  
36           when detected using the light microscope. Although no current proof of WzSV8 is the cause  
37           of disease, it is important to investigate new viruses and related tissue anomalies, even from  
38           normal cultivated shrimp, to determine whether they may have any relationship to significant  
39           negative effects on the production of cultivated shrimp.  
40

41

42 **Keywords:** Wenzhou shrimp virus 8 (WzSV8); *Penaeus vannamei* picornavirus (PvPV);  
43 *Penaeus vannamei* solinvivirus (PvSV); RT-PCR; histological diagnosis; pathognomonic  
44 inclusions

45

## 46 INTRODUCTION

47 Wenzhou shrimp virus 8 (WzSV8) (Li et al. 2015) was discovered in 2015 by wide screening  
48 of marine animals for RNA viruses using high throughput sequencing and the resulting  
49 GenBank record (KX883984.1) of the full genome sequence is 10,445 nucleotides. A more  
50 recent publication from China also gives another full genome sequence (GenBank record  
51 OK662577.1) that is highly similar to that of WzSV8 (97% coverage and 95.4% sequence  
52 identity), but under the newly proposed name *Penaeus vannamei* picornavirus (PvPV) with a  
53 full genome sequence of 10,550 nucleotides (Liu et al., 2021). The authors placed PvPV in  
54 the Order Picornvirales, Family *Dicistroviridae* as a positive-sense, ssRNA virus. In 2022,  
55 yet another highly similar sequence (GenBank accession: OP265432) was submitted under  
56 the name *Penaeus vannamei* solinvivirus (PvSV) (Cruz-Flores et al. 2022). We received a  
57 copy of this publication only during the review process for this report.

58

59 Although the PvPV article contained no histological analysis, it did include an electron  
60 micrograph of a cytoplasmic viral inclusion within a vacuole of an unspecified  
61 hepatopancreatic epithelial cell (Liu et al., 2021). In contrast, the PvSV article did include  
62 histological analysis accompanied by ISH test results, but they differed from those reported  
63 herein. Specifically, the ISH positive signals were present only in the nuclei of cells that  
64 appeared normal by hematoxylin and eosin (H&E) staining. In contrast to the publication by  
65 Cruz-Flores et al. (2022), we found that some WzSV8-positive shrimp specimens also  
66 showed, in addition to normal cells with ISH-positive nuclei, other unique histopathological  
67 lesions that can be considered pathognomonic for WzSV8 infection. These pathognomonic  
68 lesions would be useful for histopathologists who commonly use the light microscope in  
69 routine screening for pathogens. In addition, histopathological analysis can be used for  
70 screening archived paraffin blocks for microscopic detection of WzSV8 while RT-PCR  
71 analysis and ISH might not be an option because of the instability of RNA.

72

73 After the publication reporting WzSV8 (Li et al., 2015) and a subsequent publication from  
74 Australia reporting the presence of WzSV8 in the transcriptome of wild *Penaeus monodon*  
75 (Huerlimann et al., 2018), we used the sequence of KX883984.1 to design an RT-PCR  
76 detection method for WzSV8. We then used the RT-PCR protocol with fresh shrimp  
77 specimens submitted by clients to screen for the presence of WzSV8. This involved taking  
78 samples for RNA extraction together with tissue preparation for subsequent histopathological  
79 analysis. Tissue samples from shrimp positive for WzSV8 by RT-PCR were then subjected to  
80 ISH analysis to locate WzSV8 infected cells and reveal their morphology. Parallel tissue  
81 sections stained with hematoxylin and eosin (H&E) could then be examined to determine  
82 whether H&E stained lesions characteristic of WzSV8 could be identified.

83

84 Because WzSV8 is an RNA virus, archived shrimp specimens preserved in paraffin blocks  
85 for histological analysis cannot be used for ISH analysis because of the instability of RNA.  
86 Care must even be taken with a short period of fixation in Davidson's fixative to obtain  
87 reliable ISH results. Thus, in the current absence of a validated immunohistochemical  
88 method, long-storage, paraffin-embedded tissues cannot be used for molecular analysis.  
89 These limitations do not apply to analysis of the unique lesions by H&E staining.

90  
91 The purpose of this report is to provide information allowing for the detection of WzSV8  
92 infections using standard light microscope methods for examination of shrimp  
93 hepatopancreatic tissue sections stained with hematoxylin and eosin. An RT-PCR protocol to  
94 screen for WzSV8 is also provided.

## 95 96 **MATERIALS AND METHODS**

### 97 **Sample sources and overall research protocol**

98 Samples from global clients from the Americas and the Indo-Pacific were used as RNA  
99 templates to develop a nested RT-PCR method for WzSV8. The forward and reverse primers  
100 for the first RT-PCR and the nested PCR were designed from the sequences of GenBank  
101 record KX883984.1. This was done prior to our knowledge of the publication on *PvPV* (Liu  
102 et al., 2021) and submission of its genome sequence (OK662577.1) to GenBank. The RT-  
103 PCR amplicons from three specimens from the Indo-Pacific (SG1.1, SG1.2, and SG 1.3) and  
104 from the Americas (SG2.1, SG2.2, and SG2.3) were subjected to sequencing and  
105 bioinformatics analysis. The exact source of our specimens is confidential client information.  
106 Our clients have been fully informed of our results. If any reporting to national competent  
107 authorities is required, it is the client's responsibility to do so. It is then the responsibility of  
108 the respective national competent authority to report, in turn, to any international organization  
109 which they may have committed to do so.

110

### 111 **Histological analysis**

112 Standard methods were used for shrimp fixation and processing to prepare hematoxylin and  
113 eosin (H&E) stained tissue sections (Bell and Lightner, 1988). These were analyzed using a  
114 Leica ICC50 HD digital light microscope. For semi-thin sections, tissue samples were  
115 removed from the outer, E-cell region of the hepatopancreas for fixation in 4%  
116 glutaraldehyde solution (4% glutaraldehyde, 19 mM NaH<sub>2</sub>PO<sub>4</sub>·H<sub>2</sub>O, 81 mM Na<sub>2</sub>HPO<sub>4</sub>, pH  
117 7.4), embedded in epoxy resin, sectioned using a Leica EM UC6 ultramicrotome with a glass  
118 knife and stained with toluidine blue as previously described (Sriurairatana et al., 2014).

119

### 120 **RT-PCR method**

121 The first step RT-PCR reaction is performed in 12.5 µl mixture consisting of 1X Reaction  
122 Mix (Invitrogen, USA), 0.4 µM each of WzSV8-482F and WzSV8-482R primers (Table 1),  
123 0.5 µl of SuperScript III RT/Platinum Taq Mix (Invitrogen, USA) and 100 ng of RNA  
124 template. The RT-PCR protocol begins with 50°C for 30 min followed by 94°C for 2 min and  
125 then by 35 cycles of 94°C for 30 sec, 60°C for 30 sec and 68°C for 45 sec plus a final  
126 extension at 68°C for 5 min. For the nested PCR step, the 12.5 µl mixture contains 1X  
127 OneTaq Hot Start Master Mix (NEB, USA), 0.2 µM of each WzSV8-168F and WzSV8-168R

128 primer (**Table 1**), and 1 µl of the product solution from the first RT-PCR step. The nested  
129 PCR protocol is 94°C for 5 min, followed by 25 cycles of 94°C for 30 sec, 60°C for 30 sec  
130 and 72°C for 30 sec plus a final extension for 5 min at 72 °C. The amplicons yielded are 482  
131 bp and 168 bp, respectively.

132

133 **Table 1.** Primers used for the nested RT-PCR detection method for WzSV8 developed in this  
134 study.

135

| Method       | Primer name | Sequence (5'-3')              | Amplicon size (bp) |
|--------------|-------------|-------------------------------|--------------------|
| First RT-PCR | WzSV8-482F  | <b>ATGCCTCTGGAAAGCGATAC</b>   | 482                |
|              | WzSV8-482R  | <b>GGTGTTAGATCGCTCCTTCTTC</b> |                    |
| Nested PCR   | WzSV8-168F  | <b>GAAAGCGATACTCCTACGACAG</b> | 168                |
|              | WzSV8-168R  | <b>TCTTGAGTTTGAGGAAGGTGAG</b> |                    |

136

### 137 **Bioinformatics analysis**

138 Multiple sequence alignment of amplicons SG1.1, SG1.2, SG1.3, SG2.1, SG2.2, and SG2.3  
139 was performed by Clustal Omega (<https://www.ebi.ac.uk/Tools/msa/clustal/>), and nucleotide  
140 sequence similarity was analyzed using the BLASTn sequence analysis tool  
141 (<https://blast.ncbi.nlm.nih.gov/Blast.cgi>). The phylogenetic tree was constructed using  
142 MEGA 7 program. **Tree topology was evaluated using bootstrap analysis by the maximum  
143 likelihood method with default parameters for 1000 replicates.**

144

### 145 ***In situ* hybridization (ISH)**

146 ISH assays were carried out as previously described (Srisala et al., 2021). Briefly, the primers  
147 WzSV8-482F and WzSV8-482R (Table 1) were used with a plasmid template containing  
148 cDNA of a WzSV8 genome fragment to prepare a DIG-labeled, DNA probe for WzSV8. The  
149 negative controls consisted of adjacent tissue sections that were treated the same as the test  
150 samples, except for omission of the DIG-labeled probe. Each ISH included 3 adjacent tissue  
151 sections, one for H&E staining, one for the ISH probe and one for a no-probe control.

152

## 153 **RESULTS AND DISCUSSION**

### 154 **Nested RT-PCR detection of WzSV8**

155 The primers designed for WzSV8 were based on the nucleotide sequence record of GenBank  
156 accession no. KX883984.1. A schematic diagram representing primer regions specific to a  
157 portion upstream (nt 3889-nt 4370) of the putative RNA-dependent RNA polymerase (RdRp)  
158 is shown in **Fig. 1**. The sensitivity of the method is 20 copies per reaction vial using purified  
159 WzSV8 amplicons as the template. An agarose gel showing RT-PCR amplicons obtained  
160 from 3 samples each from the Indo-Pacific (SG1.1, SG1.2, and SG 1.3) and the Americas  
161 (SG2.1, SG2.2, and SG2.3) is shown in **Fig. 2**.

162

163 A Clustal Omega alignment of the consensus sequences of these amplicons with the matching  
164 regions of the WzSV8 sequence (GenBank record KX883984.1) and the PvPV sequence

165 GenBank record OK662577.1 is shown in **Supplementary Fig S1**. The identity among  
166 the eight nucleotide sequences differed appreciably **Table 2**, even for the two GenBank  
167 sequences from China 93-3-98.1. This indicates relatively high variability in only 6  
168 different WzSV8 samples that may possibly differ in virulence for shrimp. Phylogenetic  
169 analysis revealed that the WzSV8 sequences of the Indo-Pacific specimens SG1 fell in a  
170 clade with the Chinese sequences and separated from the American sequences SG2. **Fig 3**  
171

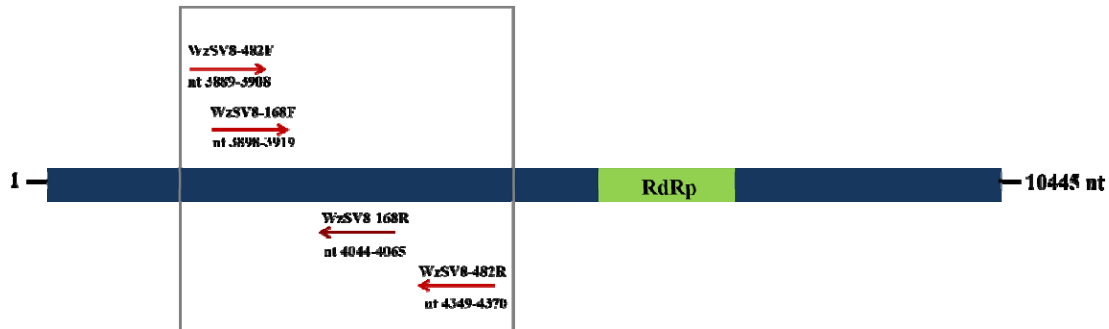

172  
173 **Figure 1** A schematic diagram representing primer regions upstream of RdRp gene. The red  
174 arrows indicate the locations of the primers for the first RT-PCR step: WzSV8-482F and  
175 WzSV8-482R, and the nested PCR step: WzSV8-168F and WzSV8-168R. The nucleotide  
176 positions of the primers according to the position of the GenBank record KX883984.1 are  
177 shown.

178

179

180

181

182

183

184

185

186

187

188

189

190

191

192

193

194

195

196

197

198

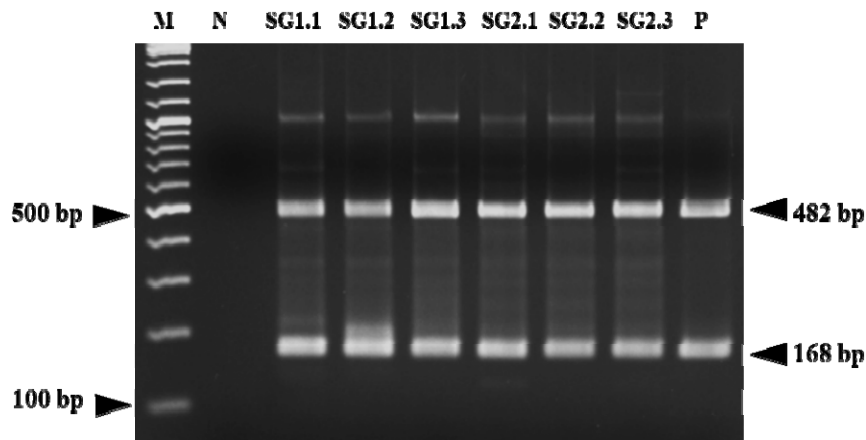

**Figure 2** Photograph of an agarose gel showing RT-PCR amplicons obtained from 6 shrimp specimens using the WzSV8 method. M: 2 log DNA marker; N: Negative control; P: Positive control.

199 **Table 2.** Percent identity matrix among the eight aligned nucleotide sequences created by  
 200 Clustal Omega program.

201

|            | SG1.1 | SG1.2 | SG1.3 | SG2.1 | SG2.2 | SG2.3 | OK662 | KX883 |
|------------|-------|-------|-------|-------|-------|-------|-------|-------|
| SG1.1      | 100.0 |       |       |       |       |       |       |       |
| SG1.2      | 92.9  | 100.0 |       |       |       |       |       |       |
| SG1.3      | 93.1  | 99.7  | 100.0 |       |       |       |       |       |
| SG2.1      | 93.9  | 92.9  | 93.1  | 100.0 |       |       |       |       |
| SG2.2      | 93.7  | 93.5  | 93.7  | 99.3  | 100.0 |       |       |       |
| SG2.3      | 92.9  | 91.7  | 91.9  | 97.7  | 97.5  | 100.0 |       |       |
| OK662577.1 | 95.6  | 94.4  | 94.6  | 93.9  | 94.6  | 93.3  | 100.0 |       |
| KX883984.1 | 96.6  | 95.6  | 95.8  | 94.8  | 95.4  | 94.1  | 98.1  | 100.0 |

202

203

204 Since our RT-PCR method was developed based on the GenBank record KX883984.1, it may  
 205 not be suitable for detection of all types of WzSV8 that exist, but we found it useful for  
 206 specimens from Asia to the Americas and it may serve as a preliminary method until a more  
 207 universal method can be developed, perhaps to cover all variants. Upon request to the  
 208 corresponding author (kallayas@gmail.com), we are willing to provide a free plasmid  
 209 containing the target for our method. It can be used to transform *E. coli* as a perpetual source  
 210 of a positive control plasmid for PCR tests and for use as a template to prepare ISH probes.  
 211 With proper acknowledgement of the source, the plasmid may be distributed freely without  
 212 seeking prior permission. We wish this tool to be distributed as widely and quickly as  
 213 possible to encourage cooperation and exchange of information on WzSV8-like viruses.

214

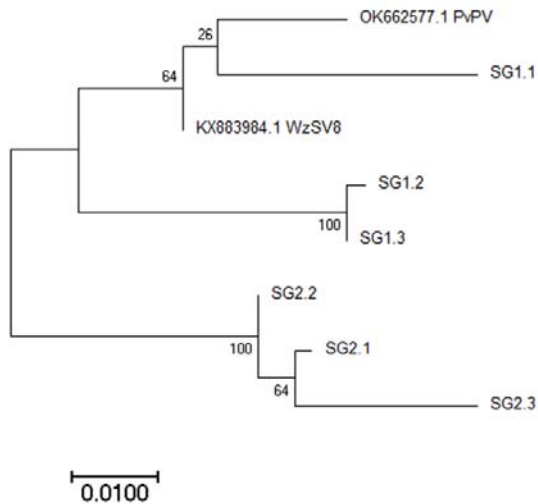

215

216 **Figure 3.** Phylogenetic tree based on RT-PCR amplicon sequences of 6 shrimp specimens  
 217 compared to matching regions of two WzSV8 nucleotide sequences at GenBank. The tree was  
 218 constructed using the maximum likelihood method with MEGA 7 software. The percentages of  
 219 replicate trees in which the associated taxa clustered together in the bootstrap test (1000  
 220 replicates) are shown next to the branches.

221



## 222 Identification of WzSV8 lesions in shrimp tissues by ISH

223 Our first set of shrimp positive for WzSV8 by RT-PCR were processed for histological  
224 analysis by H&E staining and by ISH analysis using a DIG-labeled probe prepared by PCR  
225 using the plasmid containing the WzSV8 target sequence. Prior to our ISH tests, we did not  
226 know the target tissue for WzSV8 except for one electron micrograph in the paper on PvPV  
227 (Liu et al. 2021) showing a viral inclusion in a vacuole of an unidentified HP cell. Examples  
228 of positive ISH reactions for WzSV8 in an HP sample are shown (black arrows) in a low  
229 magnification photomicrograph (Fig. 4). This gives a positional reference for the higher  
230 magnification photomicrographs that follow. The figure also shows the lack of ISH reactions  
231 in the no-probe control. The section shown in Fig. 4 is a tangential section of the rounded,  
232 outer region of the HP. The tubules of the HP extend outward in a radial manner from the  
233 central (proximal) region of the HP to its outer (distal) perimeter. Thus, the area at the center  
234 of this HP section (indicated by an asterisk in Fig. 4) is deeper in the HP than the edges of the  
235 image. The center is characterized by the presence of prominent vacuoles of differentiated B-  
236 cells and R-cells. In the area around the asterisk, the tubules have been cut perpendicular to  
237 the tubule axis (i.e., cross-cut).

238

239

240

241

242

243

244

245

246

247

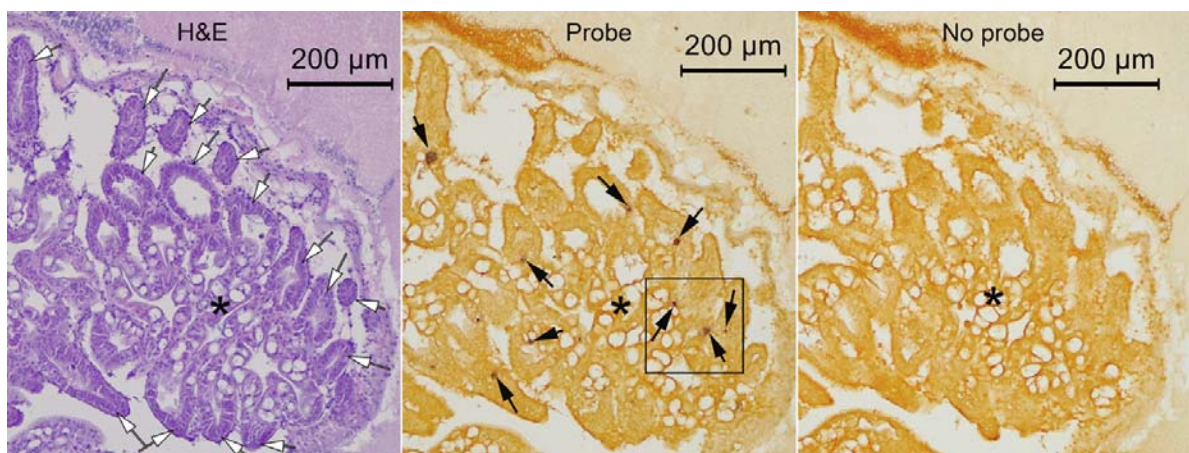

248

249

250

251

252

253

254

255

256

257

258

259

260

261

262

**Figure 4.** Low magnification photomicrographs from an ISH assay, showing positive ISH reactions (black arrows). These are often found predominantly in E-cells and less frequently in areas (asterisks) of differentiated HP tubule epithelial cells characterized by the presence of vacuoles. The box in the middle of photomicrograph is shown at higher magnification in Fig. 5.

In contrast, moving radially outward from the central area of the section, the tubules are cut more tangential to their long axis and look finger-like, terminating in rounded, conical ends (white-filled arrows) that show cells predominantly without vacuoles. Herein, we refer to these densely stained areas with no to low vacuoles as “E-cell” regions of the HP. The tubule tips themselves include only E-cells that are normally characterized by lack of vacuoles and by the presence of mitotic spindles. Moving from these distal tubule tips towards the proximal end of the tubule, the E-cells begin to differentiate into B, F and R cells and mitotic spindles are not seen.

263 In the samples we examined, we found that the positive ISH reactions were predominantly in  
264 the distal area of the HP i e , in or near the E-cell region rather than in the more proximal  
265 differentiated region However, this varied greatly from specimen to specimen A portion of  
266 the ISH photomicrograph in Fig 4 box outline is shown at higher magnification in **Fig 5**,  
267 where it can be seen that 2 of the positive ISH signals in the E-cells arise from circular  
268 inclusions within vacuoles which do not normally occur in E-cells Also in Fig 5 is an E-cell  
269 with a positive ISH reaction in both the nucleus and cytoplasm of a cell that has otherwise  
270 normal morphology and would not be recognizable as an abnormal cell by H&E staining  
271 Additional ISH positive circular inclusions within vacuoles in the cytoplasm of E-cells are  
272 shown in **Fig 6** collected from other samples

273  
274  
275  
276  
277  
278  
279  
280  
281  
282  
283  
284

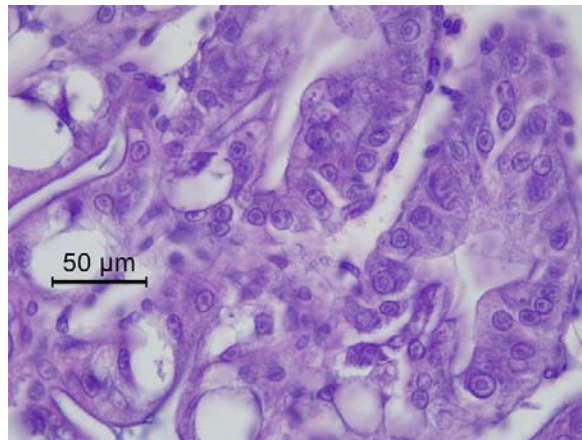

285 **Figure 5** Magnification of the box in Fig  
286 4 showing 2 positive ISH reactions as dark,  
287 circular positive signals in vacuoles,  
288 resembling the position and shape of  
289 basophilic inclusions seen in vacuoles with  
290 H&E staining Also shown is another ISH  
291 positive cell with no circular inclusion but  
292 instead positive ISH reactions in both the  
293 nucleus and cytoplasm This positive cell  
294 would not differ from other normal cells  
295 with H&E staining

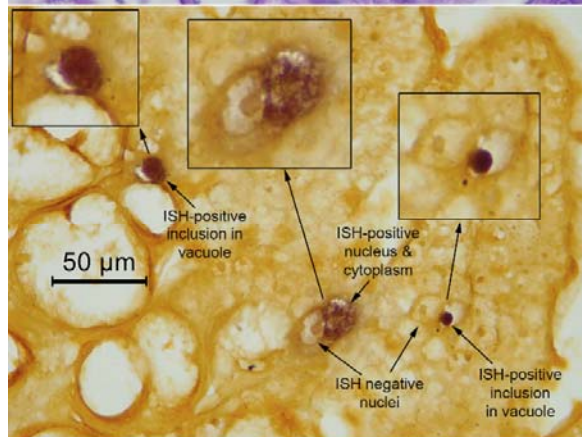

296  
297  
298  
299  
300  
301  
302  
303  
304  
305  
306

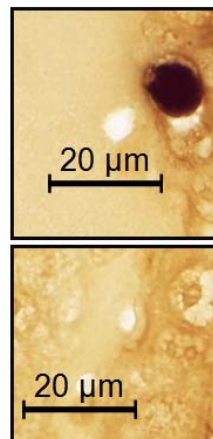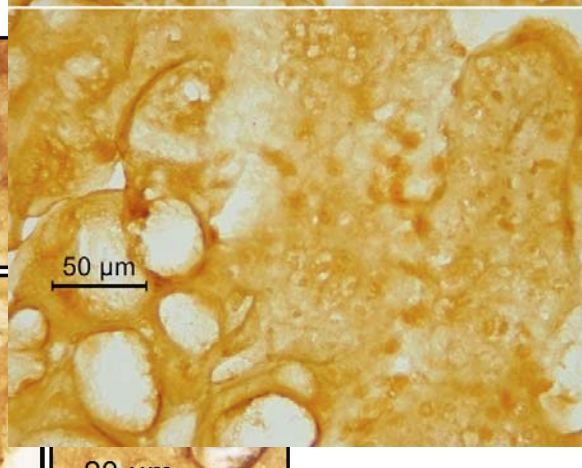



307

308

309

310

311

312

313

314 **Figure 6.** A collection of 4 photomicrographs from various samples showing high  
315 magnifications of ISH positive reactions with circular inclusions within vacuoles of E-cells.  
316 The sizes of the inclusions range from approximately 3 to 11  $\mu\text{M}$ .

317

318 Although we could not find three adjacent tissue sections that showed the same cell with the  
319 same inclusion in all 3, we were able to establish a consistent and unique morphological  
320 pattern for at least some of the WzSV8 lesions. This consisted of a deeply basophilic, circular  
321 inclusion, most distinctively within a clearly defined cytoplasmic vacuole of tubule epithelial  
322 cells in the E-cell region of the shrimp HP where vacuoles normally do not occur. Although  
323 these lesions also occurred in tubule epithelial cells in the medial and proximal regions of the  
324 HP, the presence of basophilic cytoplasmic, vacuolar inclusions in the E-cell region have not  
325 previously been reported for shrimp, so they provide a convenient focus for rapid histological  
326 detection of WzSV8 infections.

327

328 Some of the specimens RT-PCR positive for WzSV8 were grossly normal and obtained from  
329 normal harvest ponds. Others, including tissue sections on archived slides or new slides  
330 prepared from archived paraffin blocks, originated from diseased shrimp. For example, some  
331 exhibited pathological lesions caused by bacteria and/or the microsporidian *Enterocytozoon*  
332 *hepatopenaei* (EHP) in the medial and proximal areas of the HP. Sometimes, the lymphoid  
333 organs showed the presence of spheroids. However, these lesions gave negative ISH reactions  
334 with the WzSV8 probe (not shown).

335

### 336 **Some specimens gave positive ISH reactions for WzSV8 in normal nuclei**

337 In some of our specimens positive for WzSV8 by RT-PCR, there were occasionally ISH  
338 positive signals in nuclei of normal tubule epithelial cells in the medial and proximal areas of  
339 the HP (**Supplementary Fig. 2**) and in the subcuticular epithelium, and especially the  
340 subcuticular epithelium of the stomach (**Supplementary Figs. S3 & S4**). Such ISH reactions  
341 rarely occurred in the E-cell region. In the adjacent sections stained with H&E in S2-S4, the  
342 nuclei and the cytoplasm are histologically normal (i.e., no visible cytopathic effects or  
343 lesions). This type of ISH reaction within morphologically normal nuclei was found to occur  
344 in some specimens in which the abnormal cytoplasmic, circular inclusions shown in Figs. 4 to  
345 8, 10 and 11 were absent. However, both types of ISH reactions occurred together in other  
346 specimens. The type of positive ISH reaction in nuclei that appear normal by H&E staining  
347 was the only type of reaction reported by Cruz-Flores et al. (2022) in their PvSV-infected  
348 specimens. They described no circular inclusions in HP cytoplasmic vacuoles similar to those  
349 we found that were similar to the TEM image of a circular vacuolar inclusion containing

350 PvPV virions in the publication by Liu et al. (2021). We are uncertain about the relationship  
351 between the ISH reactions in vacuolar inclusions versus those in nuclei, but we hope that  
352 TEM may provide some insight. In addition, it is possible that the positive ISH reactions  
353 might arise from endogenous viral elements (EVE) of WzSV8 within the genomic DNA of  
354 the respective RT-PCR positive specimens. For example, EVE of WzSV8 have been reported  
355 from *P. monodon* in Australia (Huerlimann et al., 2018).

356

357 In summary, our ISH assays in WzSV8 RT-PCR positive shrimp revealed that only the  
358 unusual lesions that occurred in E-cells were morphologically and locationally distinctive  
359 enough to be useful for rapid screening of H&E-stained tissues for matching lesions. These  
360 lesions consisted of circular, ISH-positive inclusions within cytoplasmic vacuoles of tubule  
361 epithelial cells in the E-cell region, and we could use the location and morphology of the  
362 lesions to search H&E-stained tissues for cells with similar lesions.

363

#### 364 **WzSV8 lesions in H&E-stained tissues have some unique characteristics**

365 H&E-stained tissue sections adjacent to the sections that had given positive ISH reactions  
366 were screened for the presence of lesions characterized by circular inclusions within  
367 cytoplasmic vacuoles of tubule epithelial cells in the E-cell region. Thus, we discovered  
368 cytoplasmic, deeply basophilic inclusions that were circular in section and were contained  
369 within a cytoplasmic vacuole. These are illustrated in **Figs. 7 and 8** in which tangential HP  
370 sections reveal HP tubules at their distal regions where B-cells, R-cells and F-cells are absent.  
371 These inclusions should not be confused with metaphase plates in plane section (**Fig. 9**)  
372 commonly seen in E-cells where there is a high rate of cell division. Although these deeply  
373 basophilic, circular inclusions of WzSV8 were dominant in the lesions, there were also  
374 variations in lesion appearance. For example, some lesions showed the basophilic inclusion  
375 associated with a nearby or attached, eosinophilic, circular inclusion, usually of smaller size  
376 (**Fig. 10**) (i.e., “double-inclusions”).

377

378 Sometimes the lesions were also seen in differentiated HP tubule epithelial cells (confirmed  
379 by ISH), and an example photomicrograph of WzSV8 inclusions in R-cells is shown in **Fig.**  
380 **11**. In addition, the double-inclusions in some lesions were sometimes separated by an  
381 unstained space from a surrounding basophilic to magenta colored “surround” of variable  
382 thickness that was itself surrounded by an unstained space. We are uncertain as to the steps in  
383 development of the “surround” but speculate that it may consist of the whole cell cytoplasm  
384 that has shrunk away (preparation artifact?) from adjacent cells. Hopefully, further TEM  
385 investigations will clarify this issue.

386

387  
388  
389  
390  
391  
392  
393  
394  
395  
396  
397  
398  
399  
400  
401  
402  
403  
404  
405  
406  
407  
408  
409  
410

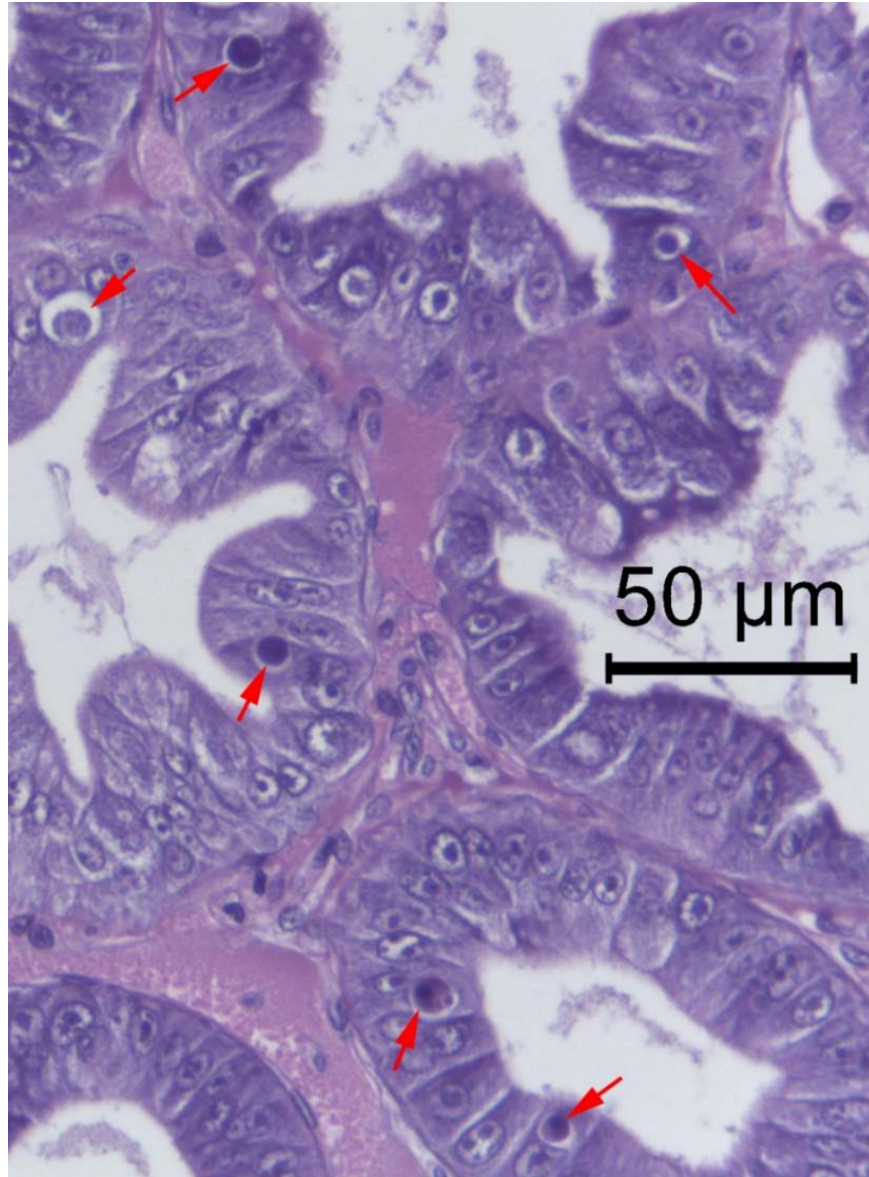

411  
412  
413  
414  
415  
416  
417  
418  
419  
420  
421  
422  
423

**Figure 7.** Photomicrograph taken using a 40x objective showing E-cells of the shrimp hepatopancreas containing WzSV8 cytoplasmic inclusions within vacuoles (red arrows). They have variable morphology and staining properties. The dominant ones are deeply basophilic and mostly perfectly circular. The lightly basophilic inclusion on the upper far left may be an early developmental stage, while the bottom two are more complex and show some eosinophilic staining in addition to a central, circular, densely basophilic inclusion.

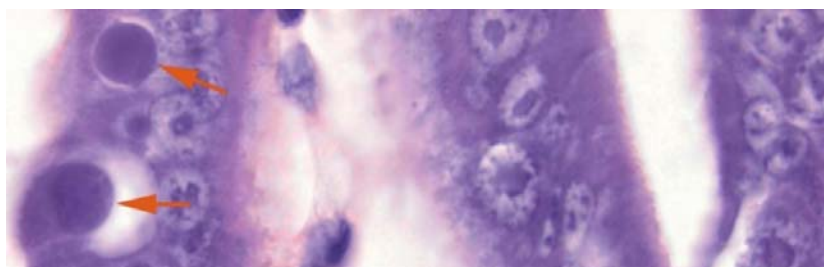

424

425

426

427

428

429

430

431

432

433

434

435

436

437

438

439 **Figure 8.** Example photomicrographs of the most common, circular, lightly to deeply  
440 basophilic, cytoplasmic inclusions of WzSV8 within vacuoles in E-cells.

441

442

443

444

445

446

447

448

449

450

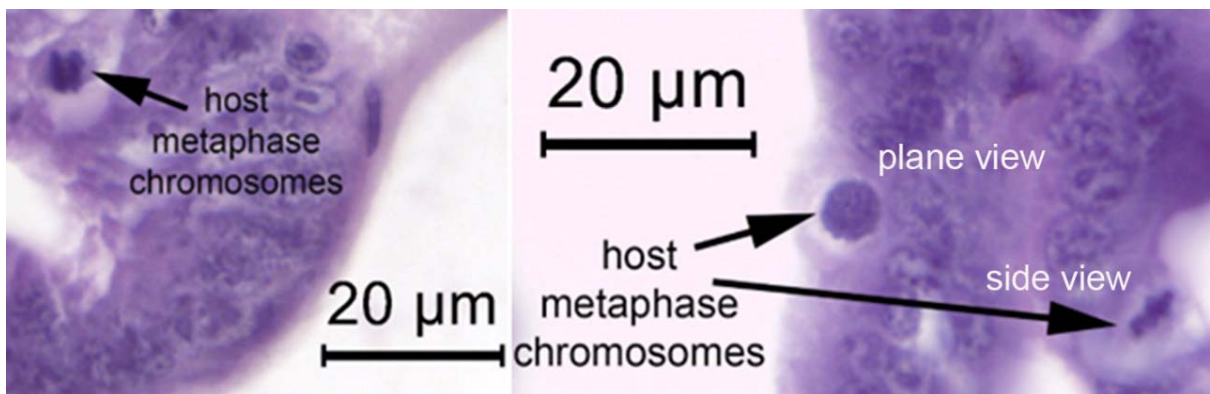

451

452 **Figure 9.** Example photomicrographs of metaphase chromosomes in E-cells that may  
453 sometimes resemble WzSV8 inclusions when the tissue section passes through the plane of  
454 the metaphase plate rather than the side. One must be careful not to confuse these with  
455 WzSV8 inclusions.

456

457

458

459

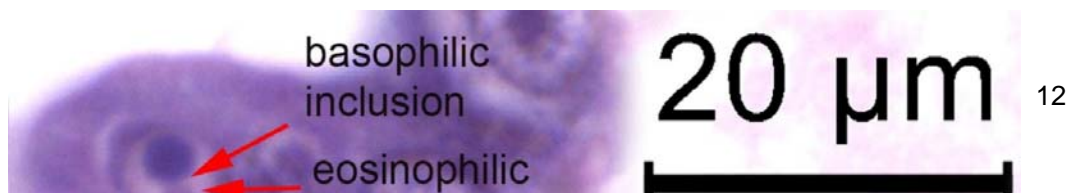



460  
461  
462  
463  
464  
465  
466  
467  
468  
469  
470  
471  
472  
473  
474  
475  
476  
477  
478  
479  
480  
481  
482  
483  
484  
485  
486  
487  
488  
489  
490  
491  
492  
493  
494  
495

**Figure 10.** Variations in basophilic WzSV8 inclusions that are sometimes accompanied by usually smaller, circular, eosinophilic satellite inclusions. This is a highly distinctive combination, such that “densely basophilic, circular inclusions accompanied by a closely associated satellite, eosinophilic inclusion within an E-cell vacuole” may be considered pathognomonic for WzSV8.

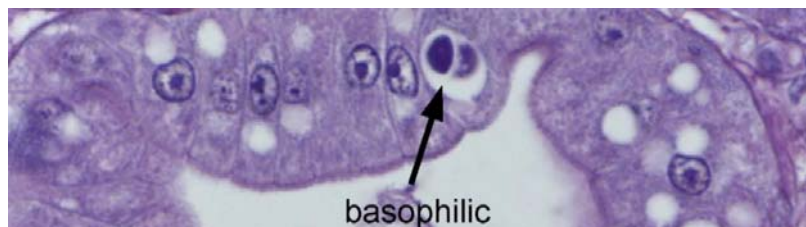

496

497

498

499

500

501

502

503

504

505

506

507 **Figure 11.** Photomicrograph of WzSV8 basophilic inclusions in differentiated cells (R-cells)  
508 of the shrimp hepatopancreas.

509

510 The double-inclusions consisting of a basophilic and eosinophilic partner may be common,  
511 but the eosinophilic partners are mostly small in comparison to the larger basophilic inclusion  
512 such that the probability of them appearing together in 4-micron tissue sections would be  
513 small. Thus, it is difficult to determine whether this unique pairing occurs regularly or is of  
514 low occurrence. More work is needed to determine the variation in elements that accompany  
515 the mostly circular ISH positive inclusions and how they develop. For example, it is likely  
516 from the TEM work by Liu et al. (2021) that the circular basophilic inclusion consists of  
517 WzSV8 virions, but it is not known whether the eosinophilic satellite originates from the  
518 virus itself, or from the host in response to the viral infection. Hopefully, TEM will help to  
519 clarify their nature and origin. However, this does not detract from the diagnostic value of  
520 their unique occurrence. For example, the Cowdry A type inclusion (an intranuclear,  
521 eosinophilic inclusion surrounded by an unstained space that separates it from the basophilic,  
522 maginated chromatin) is useful in identifying the shrimp virus IHHNV but is an artifact that  
523 arises from the use of acidic fixatives like Davidson's fixative (Lightner 1996). Despite being  
524 an artifact, the Cowdry A type inclusion is considered to be a useful character for detecting or  
525 diagnosing IHHNV infections

526

527 Photomicrographs of semi-thin sections of WzSV8 inclusions in E-cells are also shown in  
528 **Fig. 12** stained with toluidine blue. The double-inclusions are so distinctive in their nature by  
529 both H&E staining and in semi-thin sections that their occurrence, together with their  
530 common location in E-cells may be considered pathognomonic for WzSV8 infection. We  
531 propose calling these unique double inclusions "Lightner double inclusions" (LDI) to honor  
532 recently deceased Prof. Donald V. Lightner to whom we are greatly indebted for his  
533 monumental contributions in the field of shrimp pathology.

534

535

536

537

538

539

540

541

542

543

544

545

546

547

548

549

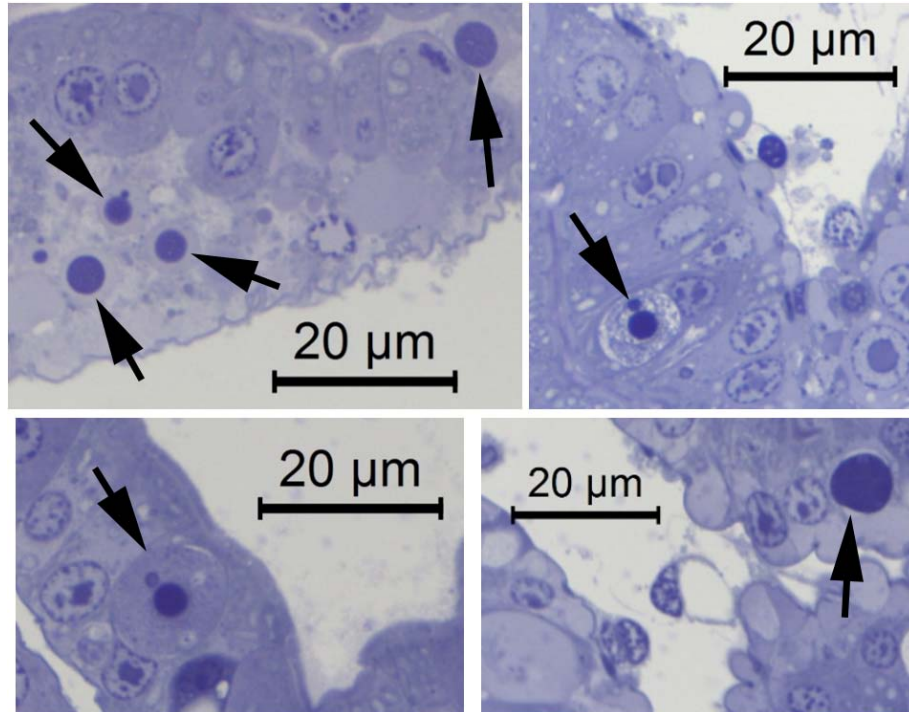

550

551 **Figure 12.** Photomicrographs of semi-thin sections of shrimp HP tissue showing variation in  
552 WzSV8 inclusions (dark blue and circular) in E-cells of the shrimp hepatopancreas. Some  
553 show a smaller, adjacent satellite inclusion or other vacuolar contents.

554

#### 555 **Retrospective on WzSV8 inclusions**

556 In retrospect, we had previously seen WzSV8 inclusions in both *P. monodon* and *P.*  
557 *vannamei* from several shrimp farming countries in Austral-Asia since at least 2008. They  
558 were described as of unknown origin in histological reports to clients. More recently we  
559 obtained samples of *P. vannamei* from the Americas that also showed these inclusions. We  
560 regarded them as “mystery inclusions” that we originally speculated might be developmental  
561 stages of the microsporidian *Enterocytozoon hepatopenaei* (EHP). However, the “mystery  
562 inclusions” were subsequently found to be negative for EHP using a specific ISH probe for  
563 EHP (unpublished). In addition, we had already discovered by histological analysis and ISH  
564 assays that EHP does not infect E-cells (Flegel, 2012; Chaijarasphong et al., 2020). Thus, the  
565 inclusions remained a mystery.

566

567 In most cases, occurrence of the “mystery inclusions” was not associated with disease. When  
568 they were present in diseased shrimp, they occurred together with other, known lethal  
569 pathogens (bacteria or viruses) that were deemed the cause of morbidity. Lacking a clear link  
570 to disease and being sporadic in occurrence, we regarded them somewhat as a curiosity that  
571 was not pursued due to other more urgent work.

572

573 The original publication describing WzSV8 did not include information related to signs of  
574 disease, histopathology or pathogenicity (Li et al. 2015). Nor did the publications on PvPV

575 (Liu et al. 2021) and PvSV (Cruz-Flores et al., 2022). However, to confirm virulence,  
576 isolation of a new virus from moribund shrimp must be accompanied by histopathological  
577 analysis for the presence of other known pathogens together with results from challenge tests  
578 employing the new purified virus to show that it alone can produce the same disease as seen  
579 in the original diseased shrimp. To date, there is no published proof that WzSV8-related  
580 viruses have caused disease, and we have many histological samples from normal shrimp  
581 dating back over a decade that show the distinctive WzSV8 LDI. This suggests that WzSV8-  
582 like viruses may have had little impact on production of cultivated *P. monodon* and *P.*  
583 *vannamei*.

584

585 Despite historical evidence indicating lack of virulence, it is possible that many types of  
586 WzSV8 exist and that some may be lethal or may contribute to mortality in combination with  
587 one or more other pathogens or under some environmental conditions. It is also possible that  
588 a new, more virulent type is emerging. For example, yellow head virus (YHV) is known to  
589 occur in up to 8 types (Walker et al., 2021) but only one type is listed as reportable to the  
590 World Organization for Animal Health. This is what needs to be established as quickly as  
591 possible. Thus, it is important to mobilize researchers in all shrimp rearing countries to assess  
592 the distribution and potential virulence of WzSV8-like viruses. We hope that retrospective  
593 review of existing histological samples for LDI together with RT-PCR screening of fresh  
594 material will lead to rapid acquisition of new information and to the development of a more  
595 universal RT-PCR detection method. At the same time, it is important to keep in mind that a  
596 rapid rise in reports of WzSV8 occurrence will not be an indication of viral spread but simply  
597 the discovery of its current range. This virus has been around for at least a decade or more  
598 with no apparent causal link to disease.

599

600 **Acknowledgement:** This research project is supported by Mahidol University (Fundamental  
601 Fund: Basic Research Fund: fiscal year 2022) (Grant no. BRF1-054/2565) and the NSRF via  
602 the Program Management Unit for Human Resources & Institutional Development, Research  
603 and Innovation (B05F640137). We also thank Agricultural Research Development Agency  
604 (ARDA), Thailand (PRP6505030760) to Kallaya Sritunyalucksana.

605

606 **Conflict of interests:** none

607

## 608 REFERENCES

- 609 Bell, T.A., Lightner, D.V., 1988. A handbook of normal shrimp histology. World  
610 Aquaculture Society, Baton Rouge, LA.
- 611 Chaijarasphong, T., Munkongwongsiri, N., Stentiford, G.D., Aldama-Cano, D.J., Thansa, K.,  
612 Flegel, T.W., Sritunyalucksana, K., Itsathitphaisarn, O., 2020. The shrimp  
613 microsporidian *Enterocytozoon hepatopenaei* (EHP): Biology, pathology, diagnostics  
614 and control. J. Invertebr. Pathol., 107458.



- 615 Cruz-Flores, R., Andrade, T.P., Mai, H.N., Alenton, R.R.R., Dhar, A.K., 2022. Identification  
616 of a novel solinvivirus with nuclear localization associated with mass mortalities in  
617 cultured whiteleg shrimp (*Penaeus vannamei*). *Viruses*. 14, 2220.
- 618 Flegel, T.W., 2012. Historic emergence, impact and current status of shrimp pathogens in  
619 Asia. *J. Invertebr. Pathol.* 110, 166-173.
- 620 Huerlimann, R., Wade, N.M., Gordon, L., Montenegro, J.D., Goodall, J., McWilliam, S.,  
621 Tinning, M., Siemering, K., Giardina, E., Donovan, D., 2018. De novo assembly,  
622 characterization, functional annotation and expression patterns of the black tiger  
623 shrimp (*Penaeus monodon*) transcriptome. *Sci. Rep.* 8, 1-14.
- 624 Li, C.-X., Shi, M., Tian, J.-H., Lin, X.-D., Kang, Y.-J., Chen, L.-J., Qin, X.-C., Xu, J.,  
625 Holmes, E.C., Zhang, Y.-Z., 2015. Unprecedented genomic diversity of RNA viruses  
626 in arthropods reveals the ancestry of negative-sense RNA viruses. *eLife*. 4, e05378.
- 627 Lightner, D.V., 1996. A handbook of pathology and diagnostic procedures for diseases of  
628 penaeid shrimp. World Aquaculture Society, Baton Rouge, LA.
- 629 Liu, S., Xu, T., Wang, C., Jia, T., Zhang, Q., 2021. A novel picornavirus discovered in white  
630 leg shrimp *Penaeus vannamei*. *Viruses*. 13, 2381.
- 631 Péntzes, J.J., Söderlund-Venermo, M., Canuti, M., Eis-Hübinger, A.M., Hughes, J., Cotmore,  
632 S.F., Harrach, B., 2020. Reorganizing the family *Parvoviridae*: a revised taxonomy  
633 independent of the canonical approach based on host association. *Arch. Virol.*, 1-14.
- 634 Srisala, J., Sanguanrut, P., Thaiue, D., Laiphrom, S., Siri wattano, J., Khudet, J.,  
635 Powtongsook, S., Flegel, T.W., Sritunyalucksana, K. 2021. Infectious myonecrosis  
636 virus (IMNV) and Decapod iridescent virus 1 (DIV1) detected in captured, wild  
637 *Penaeus monodon*. *Aquaculture*. 545, 737262.
- 638 Sriurairatana, S., Boonyawiwat, V., Gangnonngiw, W., Laosutthipong, C., Hiranchan, J.,  
639 Flegel, T.W., 2014. White feces syndrome of shrimp arises from transformation,  
640 sloughing and aggregation of hepatopancreatic microvilli into vermiform bodies  
641 superficially resembling gregarines. *PLoS One*. 9 (6), e99170.
- 642 Walker, Peter J, Jeff A Cowley, Xuan Dong, Jie Huang, Nick Moody, John Ziebuhr, and  
643 ICTV Report Consortium. 2021. ICTV Virus Taxonomy Profile: Roniviridae. *J Gen*  
644 *Viol*, 102.
- 645  
646  
647  
648  
649  
650  
651  
652  
653

654  
655  
656  
657  
658  
659  
660  
661  
662  
663  
664  
665  
666  
667  
668  
669  
670  
671  
672  
673  
674  
675  
676  
677  
678  
679  
680  
681  
682  
683  
684  
685  
686  
687  
688

### Supplementary Figures for Wenzhou virus 8 (WzSV8) detection

```
SG1.1 ATGCTCTCTGGAAAGCGGATACACCTACGACAGCGAAAGTTTCATCACTCGCGTGACCACCA 60
SG1.2 ATGCCTCTGGAAAGCGGATACCTCTACGAAAGCGAATACATTTCATCACTCGCGTGACCACCA 60
SG1.3 ATGCCTCTGGAAAGCGGATACCTCTACGAAAGCGAATACATTTCATCACTCGCGTGACCACCA 60
SG2.1 ATGCCTCTGGAAAGCGGATACCTCTACGAAAGCGAATACATTTCATCACTCGCGTGACCACCA 60
SG2.2 ATGCCTCTGGAAAGCGGATACCTCTACGAAAGCGAATACATTTCATCACTCGCGTGACCACCA 60
SG2.3 ATGCCTCTGGAAAGCGGATACCTCTACGAAAGCGAATACATTTCATCACTCGCGTGACCACCA 60
OK662577.1 ATGCCTCTGGAAAGCGGATACCTCTACGAAAGCGAATACATTTCATCACTCGCGTGACCACCA 60
KX883984.1 ATGCCTCTGGAAAGCGGATACCTCTACGAAAGCGAATACATTTCATCACTCGCGTGACCACCA 60
*** **

SG1.1 CCCTTCAAGACGTCAGCTACTGGCAGGGTCTCCCGCTAGAAGCCATCATCTACCTCATGA 120
SG1.2 CCTTCAAGACGTCAGCTACTGGCAGGGTCTCCCGCTAGAAGCCATCATCTACCTCATGA 120
SG1.3 CCTTCAAGACGTCAGCTACTGGCAGGGTCTCCCGCTAGAAGCCATCATCTACCTCATGA 120
SG2.1 CCCTTCAAGACGTCAGCTACTGGCAGGGTCTCCCGCTAGAAGCCATCATCTACCTCATGA 120
SG2.2 CCCTTCAAGACGTCAGCTACTGGCAGGGTCTCCCGCTAGAAGCCATCATCTACCTCATGA 120
SG2.3 CCCTTCAAGACGTCAGCTACTGGCAGGGTCTCCCGCTAGAAGCCATCATCTACCTCATGA 120
OK662577.1 CCCTTCAAGACGTCAGCTACTGGCAGGGTCTCCCGCTAGAAGCCATCATCTACCTCATGA 120
KX883984.1 CCCTTCAAGACGTCAGCTACTGGCAGGGTCTCCCGCTAGAAGCCATCATCTACCTCATGA 120
* **

SG1.1 AGAATCACGAAGTCATCATCGAAGAGCACTTCCCCTCACCTTCTCAAGCTCAAGAAGA 180
SG1.2 AGAATCATCAAGTCATCATCGAAGAGCACTTCCCCCCTCACCTTCTCAAACTCAAGAAGA 180
SG1.3 AGAATCATCAAGTCATCATCGAAGAGCACTTCCCCCCTCACCTTCTCAAACTCAAGAAGA 180
SG2.1 AGAATCACGAAGTCATCATCGAAGAGCACTTCCCCCCTCACCTTCTCAAACTCAAGAAGA 180
SG2.2 AGAATCACGAAGTCATCATCGAAGAGCACTTCCCCCCTCACCTTCTCAAACTCAAGAAGA 180
SG2.3 AGAATCACGAAGTCATCATCGAAGAGCACTTCCCCCCTCACCTTCTCAAACTCAAGAAGA 180
OK662577.1 AGAATCATCAAGTCATCATCGAAGAGCACTTCCCCCCTCACCTTCTCAAACTCAAGAAGA 180
KX883984.1 AGAATCATCAAGTCATCATCGAAGAGCACTTCCCCCCTCACCTTCTCAAACTCAAGAAGA 180
*****

SG1.1 AGGCCGCGGAGATAGAAAATGCGAGATCGTCCAACAGATCACTAACTCCAAGGCCTTC 240
SG1.2 AGGCCGCGGAGATAGAAAACCTGCGAGATCGTCCAACAGATCACTAACTCCAAGGCCTTC 240
SG1.3 AGGCCGCGGAGATAGAAAACCTGCGAGATCGTCCAACAGATCACTAACTCCAAGGCCTTC 240
SG2.1 AGGCCGCGGAGATAGAAAACATGCGAGATCGTCCAACAGATCACTAACTCCAAGGCCTTC 240
SG2.2 AGGCCGCGGAGATAGAAAACATGCGAGATCGTCCAACAGATCACTAACTCCAAGGCCTTC 240
SG2.3 AGGCCGCGGAGATAGAAAACATGCGAGATCGTCCAACAGATCACTAACTCCAAGGCCTTC 240
OK662577.1 AGGCCGCGGAGATAGAAAACATGCGAGATCGTCCAACAGATCACTAACTCCAAGGCCTTC 240
KX883984.1 AGGCCGCGGAGATAGAAAACATGCGAGATCGTCCAACAGATCACTAACTCCAAGGCCTTC 240
*****

SG1.1 AGGTTGGGTTCCCCATCGCTGTGATCGGAGTTGCTGTCTACAGCAATCTTCGGGATCGCGA 300
SG1.2 AGGTTGGGTTCCCCATCGCTGTGATCGGAGTTGCTGTCTACGCAATCTTCGGGATCGCGA 300
SG1.3 AGGTTGGGTTCCCCATCGCTGTGATCGGAGTTGCTGTCTACGCAATCTTCGGGATCGCGA 300
SG2.1 AGATTGGGTTCCCCATCGCTGTGATTTGGAGTTGCTGTCTACAGCAATCTTCGGGATCGCGA 300
SG2.2 AGATTGGGTTCCCCATCGCTGTGATTTGGAGTTGCTGTCTACAGCAATCTTCGGGATCGCGA 300
SG2.3 AGATTGGGTTCCCCATCGCTGTGATTTGGAGTTGCTGTCTACAGCAATCTTCGGGATCGCGA 300
OK662577.1 AGGTTGGGTTCCCCATCGCTGTGATCGGAGTTGCTGTCTACAGCAATCTTCGGGATCGCGA 300
KX883984.1 AGGTTGGGTTCCCCATCGCTGTGATCGGAGTTGCTGTCTACAGCAATCTTCGGGATCGCGA 300
**

SG1.2 AACTCTCCTCCAGAAAAGTCCCCAAAGAAAGTCTCCGAGCCTGACAGCGACAGCT 360
SG1.3 AACTCTCCTCCAGAAAAGTCCCCAAAGAAAGTCTCCGAGCCTGACAGCGACAGCT 360
SG2.1 AACTCTCCTCCAGAAAAGTCCCCAAAGAAAGTCTCCGAGCCTGACAGCGACAGCT 360
SG2.2 AACTCTCCTCCAGAAAAGTCCCCAAAGAAAGTCTCCGAGCCTGACAGCGACAGCT 360
SG2.3 AACTCTCCTCCAGAAAAGTCCCCAAAGAAAGTCTCCGAGCCTGACAGCGACAGCT 360
OK662577.1 AACTCTCCTCCAGAAAAGTCCCCAAAGAAAGTCTCCGAGCCTGACAGCGACAGCT 360
KX883984.1 AACTCTCCTCCAGAAAAGTCCCCAAAGAAAGTCTCCGAGCCTGACAGCGACAGCT 360
*****

SG1.1 CTTCAAGCGAGTCCGAATCAGACGAAGAACAATCTGCTTCTCAGAAGTCTGAGAAGTCTC 420
SG1.2 CTTCAAGCGAGTCCGAATCAGACGAAGAACAATCTGCTTCTCAGAAGTCTGAGAAGTCTC 420
SG1.3 CTTCAAGCGAGTCCGAATCAGACGAAGAACAATCTGCTTCTCAGAAGTCTGAGAAGTCTC 420
SG2.1 CTTCAAGCGAGTCCGAATCAGACGAAGAACAATCTGCTTCTCAGAAGTCTGAGAAGTCTC 420
SG2.2 CTTCAAGCGAGTCCGAATCAGACGAAGAACAATCTGCTTCTCAGAAGTCTGAGAAGTCTC 420
SG2.3 CTTCAAGCGAGTCCGAATCAGACGAAGAACAATCTGCTTCTCAGAAGTCTGAGAAGTCTC 420
OK662577.1 CTTCAAGCGAGTCCGAATCAGACGAAGAACAATCTGCTTCTCAGAAGTCTGAGAAGTCTC 420
KX883984.1 CTTCAAGCGAGTCCGAATCAGACGAAGAACAATCTGCTTCTCAGAAGTCTGAGAAGTCTC 420
* **

SG1.1 AGACGCGAGTTGCTAGGAAATCTAAGCAATCCGCACCGAGAGAAGGAGCGCTCTAACCA 480
SG1.2 AGACGCGAGTTGCTAGGAAATCTAAGCAATCCGCACCGAGAGAAGGAGCGATCTAACCA 480
SG1.3 AGACGCGAGTTGCTAGGAAATCTAAGCAATCCGCACCGAGAGAAGGAGCGATCTAACCA 480
SG2.1 AGACGCGAGTTGCTAGGAAATCTAAGCAATCCGCACCGAGAGAAGGAGCGCTCTAACCA 480
SG2.2 AGACGCGAGTTGCTAGGAAATCTAAGCAATCCGCACCGAGAGAAGGAGCGATCTAACCA 480
SG2.3 AGACGCGAGTTGCTAGGAAATCTAAGCAATCCGCACCGAGAGAAGGAGCGCTCTAACCA 480
OK662577.1 AGACGCGAGTTGCTAGGAAATCTAAGCAATCCGCACCGAGAGAAGGAGCGATCTAACCA 480
KX883984.1 AGACGCGAGTTGCTAGGAAATCTAAGCAATCCGCACCGAGAGAAGGAGCGATCTAACCA 480
*****

SG1.1 CC 482
SG1.2 CC 482
SG1.3 CC 482
SG2.1 CC 482
SG2.2 CC 482
SG2.3 CC 482
OK662577.1 CC 482
KX883984.1 CC 482
**
```



689

690

691

692

693 **Supplementary Fig. S1.** Clustal Omega alignment of the sequences of 482 bp-amplicon  
694 obtained using the method herein from specimens of Indo-Pacific (SG1) and America (SG2)  
695 origin with the two GenBank records for WzSV8 (KX883984.1) and PvPV (OK662577.1)  
696 from China. The gaps in the line of asterisks indicate regions of difference among the 8  
697 sequences, while the grey background nucleotides highlight nucleotide differences among the  
698 eight sequences. The % identities are shown in Table 2.

699

700

701

702

703

704 **Supplementary Figure S2.**

705 Photomicrographs of adjacent tissue sections  
706 from the medial region of the hepatopancreas  
707 (HP) of a shrimp specimen positive for  
708 WzSV8 by RT-PCR. This shows *in situ*  
709 hybridization (ISH) signals (dark staining)  
710 in normal nuclei in normal tubule epithelial  
711 cells. The cells and nuclei have normal  
712 morphology in the hematoxylin and eosin  
713 (H&E) stained adjacent section. Thus, the  
714 presence of WzSV8 in specimens with such  
715 ISH positive nuclei would not be revealed by  
716 H&E staining, making H&E-stained sections  
717 of such cells of no use in diagnosis for the  
718 presence WzSV8 in such nuclei.

719

720

721

722

723

724

725

726

727

728

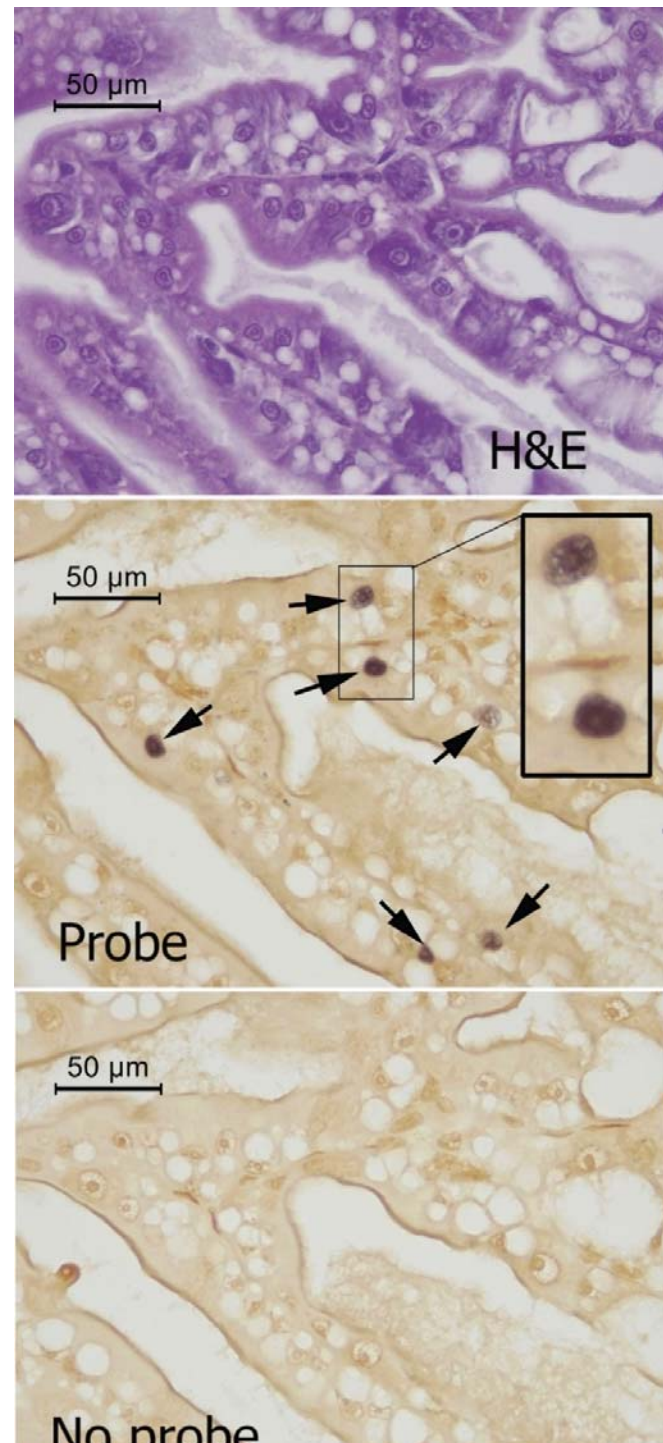

729

730

731

732

733 **Supplementary Figure S3.** Photomicrographs of adjacent tissue sections from the region of  
734 the stomach of a shrimp specimen positive for WzSV8 by RT-PCR. These are low  
735 magnification photomicrographs of adjacent tissue sections stained with H&E and also tested  
736 for the presence of WzSV8 by ISH. A. H&E stained tissue section showing the stomach  
737 cuticle, sub-cuticular epithelium and connective tissue. B. Adjacent tissue section showing  
738 positive ISH reactions in nuclei of the sub-cuticular epithelium (black arrows) and underlying  
739 connective tissue (white arrow). The box indicates the area magnified in Supplementary Fig.  
740 3. C. No probe control.

741

742

743

744

745

746

747

748

749

750

751

752

753

754

755

756

757

758

759

760

761

762

763

764

765

766

767

768

769

770

771

772

773

774

775

776

777

778

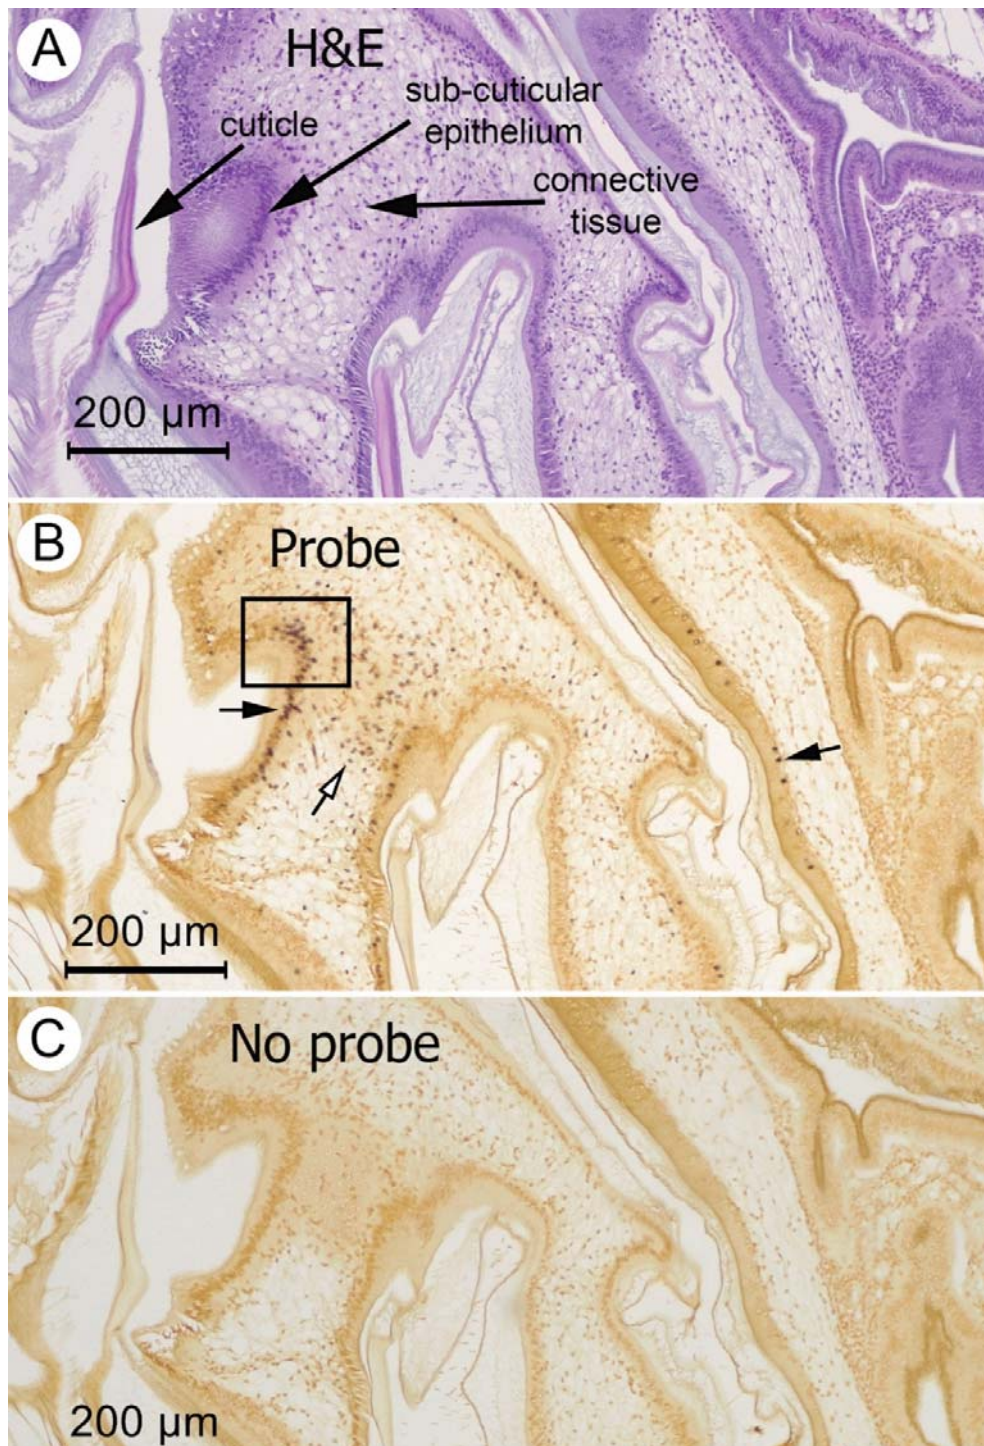



779  
780  
781  
782  
783  
784  
785  
786  
787  
788  
789  
790  
791  
792  
793  
794  
795  
796  
797  
798  
799  
800  
801  
802  
803  
804  
805  
806  
807  
808  
809  
810  
811  
812  
813  
814  
815  
816  
817  
818  
819  
820

**Supplementary Figure S4.**

Photomicrographs of the stomach area at higher magnification indicated by the box in Fig. 2B. All show normal morphology of nuclei despite positive ISH reactions shown in B. A. H&E-stained tissue section. B. Adjacent tissue section showing positive ISH reactions in nuclei (dark staining), C. Adjacent tissue section for the no-probe negative control.

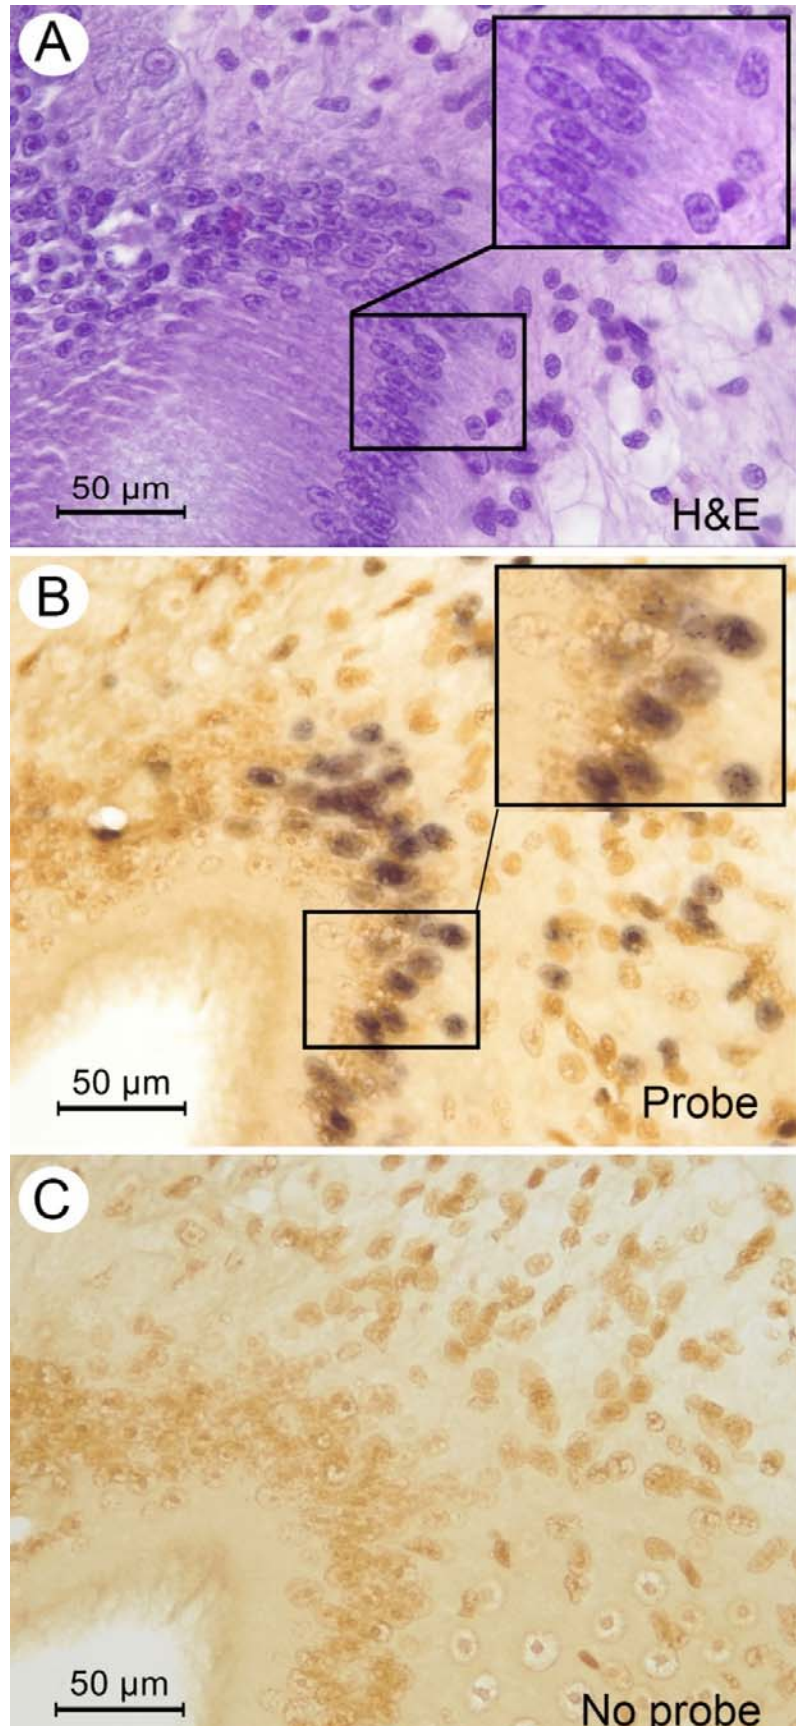

821

822

823
